# Supplementary material for: Cost-effectiveness of chiropractic care versus self-management in patients with musculoskeletal chest pain
Source: PubMed Central journal article supplement — Open Heart. 2016 May 4;3(1):e000334. doi: 10.1136/openhrt-2015-000334 (PMC4860847; doi:10.1136/openhrt-2015-000334), 2016-05-04

**Supplementary figure 1. CONSORT flow chart of participant flow through trial**

**CONSORT flow chart**

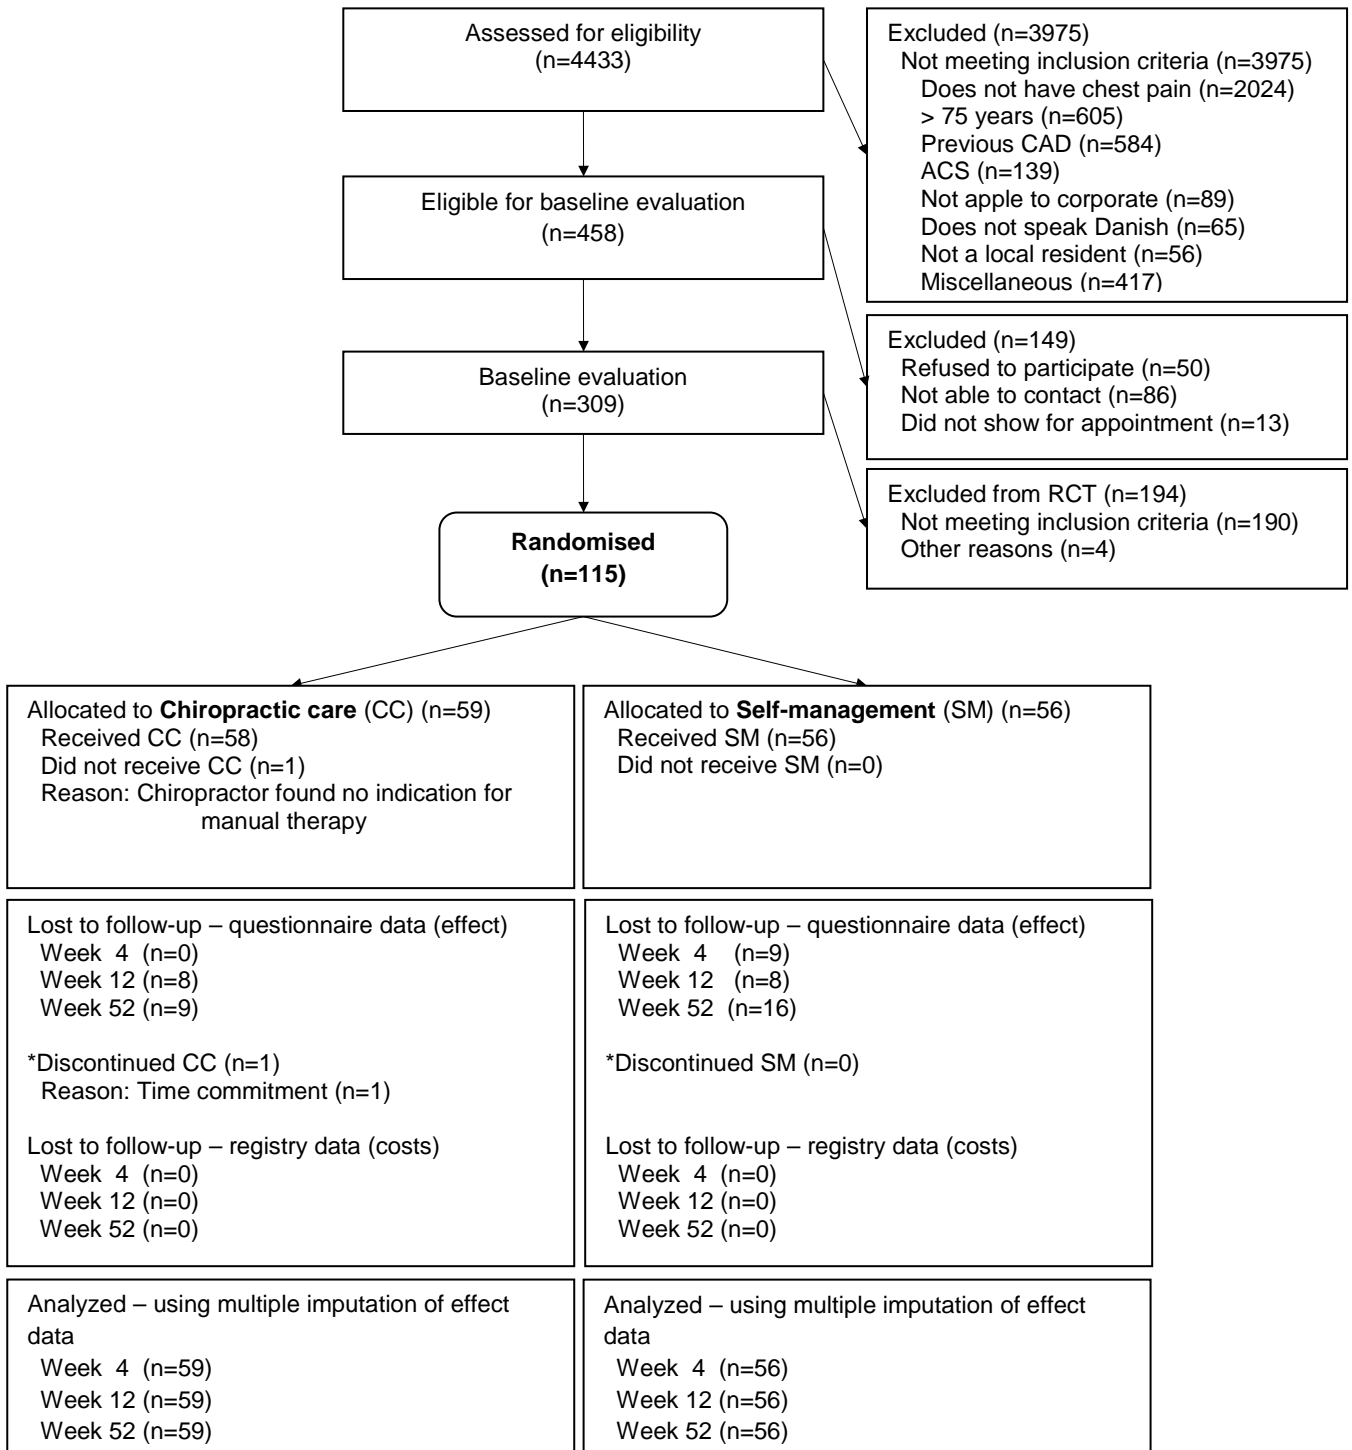

**Supplementary figure 2.** Cost-effectiveness acceptability curve showing the probability that chiropractic care is cost-effective (EQ-5D) compared to self-management over a range of values for the maximum acceptable ceiling ratio ( $\lambda$ ).

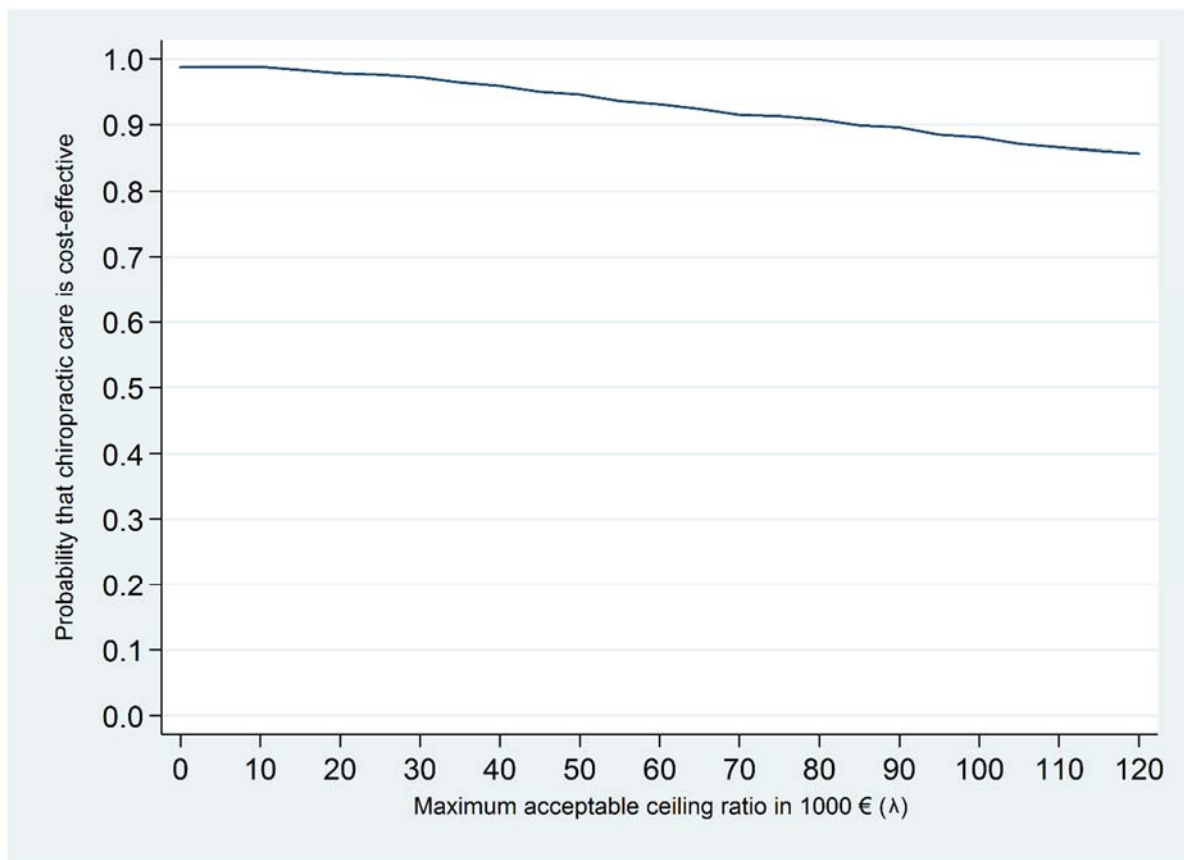

Supplement: openhrt-2015-000334supp_figures.pdf [file openhrt-2015-000334supp_figures.pdf]
